# Supplementary material for: PEG Reinforced Scaffold Promotes Uniform Distribution of Human MSC-Created Cartilage Matrix
Source: MDPI journal article supplement (doi:10.3390/gels8120794), 2022-12-03
Supplement: s1 [file s1]

# PEG Reinforced Scaffold Promotes Uniform Distribution of Human MSC-created Cartilage Matrix

Kanyakorn Riewruja <sup>1,2</sup>, Alyssa M Aguglia <sup>1,3</sup>, Sophie Hines <sup>1</sup>, Meagan J. Makarczyk <sup>1,3</sup>, Sittisak Honsawek<sup>2</sup>, and Hang Lin <sup>1,3\*</sup>

<sup>1</sup> Department of Orthopaedic Surgery, University of Pittsburgh School of Medicine; 450 Technology Drive, Rm 217, Pittsburgh, Pennsylvania, 15219, USA  
<sup>2</sup> Osteoarthritis and Musculoskeleton Research Unit, Faculty of Medicine, Chulalongkorn University, King Chulalongkorn Memorial Hospital, Thai Red Cross Society, Bangkok 10330, Thailand  
<sup>3</sup> Department of Bioengineering, University of Pittsburgh Swanson School of Engineering; 450 Technology Drive, Rm 217, Pittsburgh, Pennsylvania, 15219, USA  
 \* Correspondence: hal46@pitt.edu;

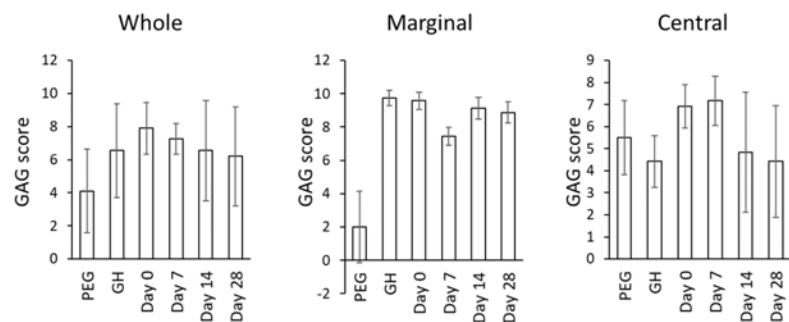

Figure S1. Assessing GAG distribution with semi-quantitative scores. Based on the staining intensity of the whole, marginal and central areas in each image of Figure 2, a score from 0 (no GAG) to 10 (most GAG) was given (n=8 fields).

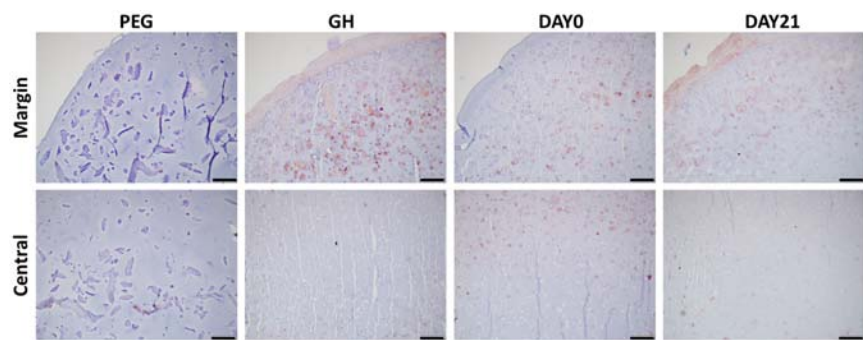

Figure S2: Collagen type II immunohistochemistry (IHC). Bar=100µm.

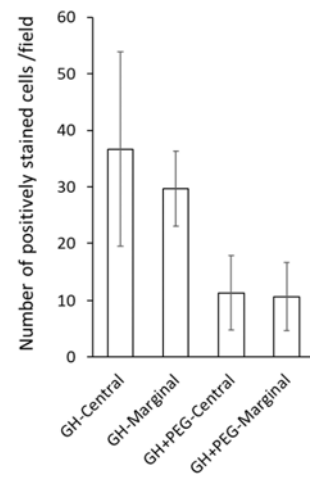

Figure S3: Qualifying ki67 positive cells in each field (512 $\mu$ m $\times$ 320 $\mu$ m). N=3.
